# Supplementary material
Source: Springer Nature journal article supplement (https://www.springermedizin.de/resource/supplementary/12882_2013_761_MOESM1_ESM.pdf/9454656)

Figure 1

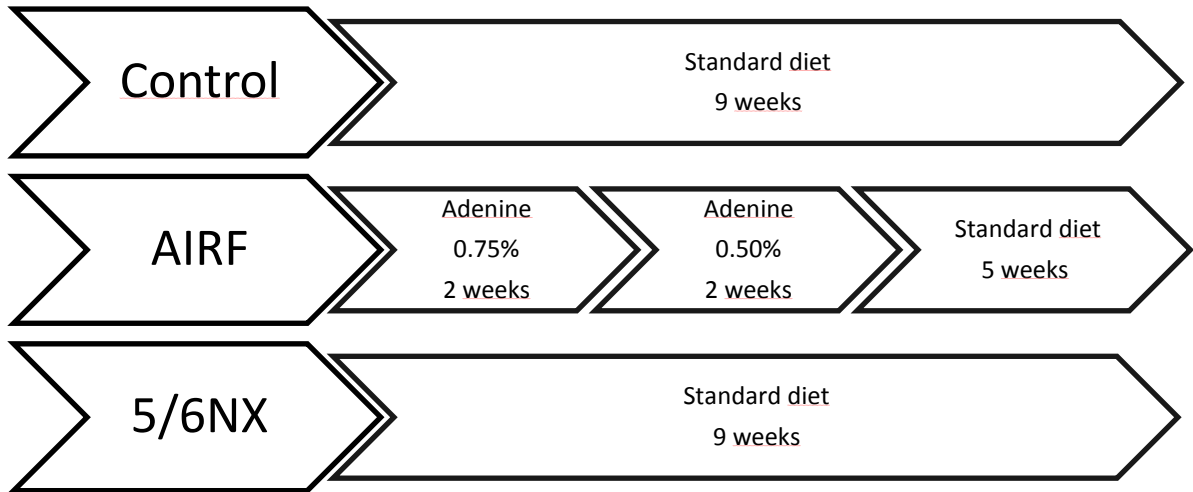

▲  
5/6Nx

▲  
SAC

Supplement: MOESM1 [file 9454656]
